# Supplementary material
Source: Copernicus journal article supplement (doi:10.5194/gc-9-291-2026)
Supplement: Supplementary file 3 [file Supplement 3.pdf › Supplement 3.pdf]

# Supplement 3 Details of the Difference in Differences Analyses

## List of Abbreviations

WaveNum: This represents the DiD coefficient which presents the interaction effect between the treatment group and the specified survey wave. For example, WaveNum = 2 × TreatGroup indicates how much better the treatment group did in the 2nd Wave, relative to the control group.

Num.Obs.: Number of observations used in the analysis.

R2: Coefficient of determination or R-squared, which indicates the proportion of variance in the dependent variable explained by the independent variables in the regression model. In simple terms, it is a measure of the explanatory power of the independent variables in interpreting changes in the dependent variable.

R2 Adj.: Adjusted R-squared, which adjusts the R-squared value for the number of predictors in the model.

R2 Within: R-squared within, which represents the extent of variance in the dependent variable explained by the independent variables within each group or category.

R2 Within Adj.: Adjusted R-squared within, which adjusts the R-squared within value by the number of predictors in the model within each group or category.

AIC: Akaike Information Criterion, which measures the relative quality of a statistical model for a given set of data. Lower AIC values indicate better-fitting models. These values are used in comparison with results from competing models to determine the model with the best fit for the data.

BIC: Bayesian Information Criterion, which is a value similar to AIC that measures the relative quality of the statistical model for a given set of data. Compared to the AIC, it penalises more complex models more heavily. Lower values here indicate better-fitting models.

RMSE: Root Mean Square Error, which represents the average deviation between predicted and observed outcomes from the analysis. A lower RMSE indicates a better fitting model that provides a more reliable and accurate estimates of the treatment effect.

Std.Errors: Standard errors of the coefficients estimated in the model.

FE: Fixed Effects, which indicates whether there was the inclusion of fixed effects in the regression model for specific categories such as W1\_ExperimentGroup, survey\_wave, and WaveNum.

p: p-values for each analysis

Numbers in the brackets indicate the 95% confidence interval values.

Table S2 Self-reported interested in Quaternary Geoheritage

DiD Results for Quaternary Geoheritage Interest (Self-Reported)

|                       | All                      | Specialists              | NonSpecialists           |
|-----------------------|--------------------------|--------------------------|--------------------------|
| WaveNum = 2 × Treated | 0.067                    | 0.056                    | 0.003                    |
|                       | [-0.302, 0.436], p=0.720 | [-0.519, 0.630], p=0.845 | [-0.441, 0.447], p=0.990 |
| WaveNum = 3 × Treated | 0.073                    | -0.056                   | 0.155                    |
|                       | [-0.282, 0.429], p=0.683 | [-0.611, 0.500], p=0.840 | [-0.310, 0.620], p=0.504 |
| Num.Obs.              | 225                      | 108                      | 117                      |
| R2                    | 0.643                    | 0.396                    | 0.751                    |
| R2 Adj.               | 0.452                    | 0.049                    | 0.610                    |
| R2 Within             | 0.001                    | 0.002                    | 0.009                    |
| R2 Within Adj.        | -0.012                   | -0.027                   | -0.018                   |
| AIC                   | 419.4                    | 222.7                    | 189.2                    |
| BIC                   | 689.3                    | 330.0                    | 308.0                    |
| RMSE                  | 0.43                     | 0.47                     | 0.38                     |
| Std.Errors            | by: email                | by: email                | by: email                |
| FE: email             | X                        | X                        | X                        |
| FE: WaveNum           | X                        | X                        | X                        |

TableS3 Self-reported level of knowledge about Quaternary Geoheritage

DiD Results for Quaternary Geoheritage Knowledge (Self-Reported)

|                       | All                      | Specialists              | NonSpecialists           |
|-----------------------|--------------------------|--------------------------|--------------------------|
| WaveNum = 2 × Treated | -0.251                   | -0.302                   | -0.106                   |
|                       | [-0.738, 0.235], p=0.307 | [-1.115, 0.512], p=0.458 | [-0.689, 0.477], p=0.715 |
| WaveNum = 3 × Treated | -0.087                   | -0.222                   | -0.101                   |
|                       | [-0.637, 0.463], p=0.753 | [-1.029, 0.585], p=0.581 | [-0.848, 0.647], p=0.787 |
| Num.Obs.              | 234                      | 117                      | 117                      |
| R2                    | 0.610                    | 0.596                    | 0.640                    |
| R2 Adj.               | 0.401                    | 0.367                    | 0.436                    |
| R2 Within             | 0.006                    | 0.008                    | 0.002                    |
| R2 Within Adj.        | -0.007                   | -0.019                   | -0.025                   |
| AIC                   | 650.0                    | 335.4                    | 300.5                    |
| BIC                   | 933.4                    | 454.1                    | 419.3                    |
| RMSE                  | 0.68                     | 0.70                     | 0.61                     |
| Std.Errors            | by: email                | by: email                | by: email                |
| FE: email             | X                        | X                        | X                        |
| FE: WaveNum           | X                        | X                        | X                        |

Table S4 Photo knowledge test question on Quaternary geoheritage sites

DiD Results for Quaternary Geoheritage Photo Quiz Scores

|                       | All                      | Specialists              | NonSpecialists           |
|-----------------------|--------------------------|--------------------------|--------------------------|
| WaveNum = 2 × Treated | -0.197                   | -0.467                   | 0.019                    |
|                       | [-0.740, 0.347], p=0.474 | [-1.324, 0.391], p=0.277 | [-0.763, 0.801], p=0.962 |
| WaveNum = 3 × Treated | 0.016                    | -0.006                   | -0.075                   |
|                       | [-0.518, 0.551], p=0.951 | [-0.852, 0.841], p=0.989 | [-0.790, 0.641], p=0.834 |
| Num.Obs.              | 225                      | 114                      | 111                      |
| R2                    | 0.660                    | 0.607                    | 0.689                    |
| R2 Adj.               | 0.478                    | 0.384                    | 0.511                    |
| R2 Within             | 0.006                    | 0.027                    | 0.001                    |
| R2 Within Adj.        | -0.008                   | -0.000                   | -0.027                   |
| AIC                   | 586.9                    | 312.7                    | 274.6                    |
| BIC                   | 856.7                    | 427.7                    | 385.7                    |
| RMSE                  | 0.63                     | 0.66                     | 0.58                     |
| Std.Errors            | by: email                | by: email                | by: email                |
| FE: email             | X                        | X                        | X                        |
| FE: WaveNum           | X                        | X                        | X                        |

Table S5 Protection Priority for Quaternary Geoheritage Sites

DiD Results for Quaternary Geoheritage Protection Priority

|                       | All                      | Specialists              | NonSpecialists           |
|-----------------------|--------------------------|--------------------------|--------------------------|
| WaveNum = 2 × Treated | 0.537                    | 0.227                    | 0.517                    |
|                       | [-0.375, 1.448], p=0.244 | [-0.995, 1.449], p=0.708 | [-0.785, 1.818], p=0.427 |
| WaveNum = 3 × Treated | 0.319                    | 0.197                    | 0.308                    |
|                       | [-0.613, 1.251], p=0.497 | [-1.111, 1.505], p=0.761 | [-1.043, 1.660], p=0.647 |
| Num.Obs.              | 222                      | 105                      | 117                      |
| R2                    | 0.625                    | 0.467                    | 0.674                    |
| R2 Adj.               | 0.424                    | 0.161                    | 0.489                    |
| R2 Within             | 0.011                    | 0.003                    | 0.009                    |
| R2 Within Adj.        | -0.003                   | -0.027                   | -0.018                   |
| AIC                   | 809.3                    | 362.9                    | 442.7                    |
| BIC                   | 1074.7                   | 466.4                    | 561.4                    |
| RMSE                  | 1.05                     | 0.94                     | 1.11                     |
| Std.Errors            | by: email                | by: email                | by: email                |
| FE: email             | X                        | X                        | X                        |
| FE: WaveNum           | X                        | X                        | X                        |

Table S6 Self-reported interest in the geocultural relationship

DiD Results for Interest in QuatGeo / Archaeology Relationship

|                       | All                      | Specialists              | NonSpecialists           |
|-----------------------|--------------------------|--------------------------|--------------------------|
| WaveNum = 2 × Treated | 0.165                    | 0.067                    | 0.193                    |
|                       | [-0.191, 0.520], p=0.358 | [-0.479, 0.612], p=0.806 | [-0.279, 0.664], p=0.413 |
| WaveNum = 3 × Treated | 0.357                    | 0.167                    | 0.562                    |
|                       | [0.004, 0.709], p=0.048  | [-0.277, 0.610], p=0.452 | [-0.046, 1.170], p=0.069 |
| Num.Obs.              | 225                      | 114                      | 111                      |
| R2                    | 0.625                    | 0.480                    | 0.713                    |
| R2 Adj.               | 0.424                    | 0.183                    | 0.549                    |
| R2 Within             | 0.027                    | 0.006                    | 0.068                    |
| R2 Within Adj.        | 0.013                    | -0.022                   | 0.042                    |
| AIC                   | 426.5                    | 224.4                    | 203.5                    |
| BIC                   | 696.4                    | 339.3                    | 314.6                    |
| RMSE                  | 0.44                     | 0.45                     | 0.42                     |
| Std.Errors            | by: email                | by: email                | by: email                |
| FE: email             | X                        | X                        | X                        |
| FE: WaveNum           | X                        | X                        | X                        |

Table S7 Self-reported knowledge in the geocultural relationship

DiD Results for Quiz Score on QuatGeo / Archaeology Relationship

|                       | All                      | Specialists              | NonSpecialists           |
|-----------------------|--------------------------|--------------------------|--------------------------|
| WaveNum = 2 × Treated | 0.037                    | -0.150                   | 0.280                    |
|                       | [-0.635, 0.708], p=0.914 | [-1.265, 0.965], p=0.787 | [-0.625, 1.184], p=0.535 |
| WaveNum = 3 × Treated | -0.157                   | -0.294                   | 0.043                    |
|                       | [-0.791, 0.477], p=0.623 | [-1.281, 0.692], p=0.549 | [-0.869, 0.956], p=0.924 |
| Num.Obs.              | 225                      | 114                      | 111                      |
| R2                    | 0.410                    | 0.406                    | 0.420                    |
| R2 Adj.               | 0.095                    | 0.068                    | 0.088                    |
| R2 Within             | 0.002                    | 0.005                    | 0.005                    |
| R2 Within Adj.        | -0.011                   | -0.023                   | -0.023                   |
| AIC                   | 723.3                    | 381.1                    | 348.0                    |
| BIC                   | 993.2                    | 496.0                    | 459.0                    |
| RMSE                  | 0.85                     | 0.89                     | 0.80                     |
| Std.Errors            | by: email                | by: email                | by: email                |
| FE: email             | X                        | X                        | X                        |
| FE: WaveNum           | X                        | X                        | X                        |

Table S8 Knowledge test question score on the geocultural relationship

| DiD Results for Self-Reported Knowledge on QuatGeo / Archaeology Relationship |                          |                          |                          |
|-------------------------------------------------------------------------------|--------------------------|--------------------------|--------------------------|
|                                                                               | All                      | Specialists              | NonSpecialists           |
| WaveNum = 2 × Treated                                                         | -0.007                   | -0.091                   | 0.011                    |
|                                                                               | [-0.318, 0.305], p=0.966 | [-0.533, 0.352], p=0.674 | [-0.410, 0.432], p=0.957 |
| WaveNum = 3 × Treated                                                         | 0.080                    | -0.000                   | 0.135                    |
|                                                                               | [-0.254, 0.414], p=0.633 | [-0.665, 0.665], p=1.000 | [-0.248, 0.519], p=0.477 |
| Num.Obs.                                                                      | 165                      | 66                       | 99                       |
| R2                                                                            | 0.650                    | 0.614                    | 0.683                    |
| R2 Adj.                                                                       | 0.459                    | 0.373                    | 0.499                    |
| R2 Within                                                                     | 0.003                    | 0.003                    | 0.008                    |
| R2 Within Adj.                                                                | -0.016                   | -0.046                   | -0.024                   |
| AIC                                                                           | 245.0                    | 107.1                    | 137.4                    |
| BIC                                                                           | 428.2                    | 164.1                    | 233.4                    |
| RMSE                                                                          | 0.36                     | 0.37                     | 0.33                     |
| Std.Errors                                                                    | by: email                | by: email                | by: email                |
| FE: email                                                                     | X                        | X                        | X                        |
| FE: WaveNum                                                                   | X                        | X                        | X                        |
