# Supplementary material
Source: Copernicus journal article supplement (doi:10.5194/gc-9-291-2026)
Supplement: Supplementary file [file gc-9-291-2026-supplement-title-page.pdf › gc-9-291-2026-supplement-title-page.pdf]

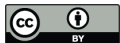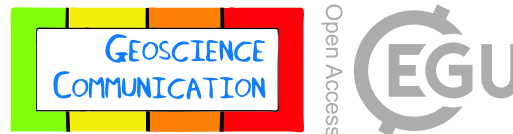

*Supplement of*

## **Including cultural context improves communication outcomes for quaternary geoheritage: evidence from southeast Arabia**

**Kenta Sayama et al.**

*Correspondence to:* Kenta Sayama ([kenta.sayama@ouce.ox.ac.uk](mailto:kenta.sayama@ouce.ox.ac.uk))

- [gc-9-291-2026-supplement-title-page.pdf](#)
- [Supplement 1.pdf](#)
- [Supplement 2.pdf](#)
- [Supplement 3.pdf](#)

The copyright of individual parts of the supplement might differ from the article licence.
